# Supplementary material for: Immune Cell Production Is Targeted by Parasitoid Wasp Virulence in a Drosophila–Parasitoid Wasp Interaction
Source: PubMed Central journal article supplement (PMC7826891; doi:10.3390/pathogens10010049), 2021-01-08
Supplement: pathogens-10-00049-s001.pdf [file pathogens-10-00049-s001.pdf]

**Table S1.** Species names, accession numbers and collection location are given for samples used to build the phylogeny shown in Figure 1A. Multiple individuals of a species are listed as independent samples with accession numbers and a numerical suffix appended to the species name. Abbreviations: NP (National Park), SP (State Park).

| Sample Name                   | Accession # | Collection Location          |
|-------------------------------|-------------|------------------------------|
| <i>Asobara sp. ABZ3773.1</i>  | KR896844.1  | Prince Albert NP, SK, CAN    |
| <i>Asobara sp. ABZ3773.2</i>  | KR898757.1  | Elk Island NP, AB, CAN       |
| <i>Asobara sp. ABZ3773.3</i>  | KR886087.1  | Elk Island NP, AB, CAN       |
| <i>Asobara sp. ABZ3773.4</i>  | KR875914.1  | Prince Albert NP, SK, CAN    |
| <i>Asobara sp. ABZ3773.5</i>  | KR884238.1  | Wellington County, ON, CAN   |
| <i>Asobara sp. ABZ3773.6</i>  | KR888074.1  | Elk Island NP, AB, CAN       |
| <i>Asobara sp. ABZ3773.7</i>  | KR879657.1  | Wellington County, ON, CAN   |
| <i>Asobara sp. ABZ3773.8</i>  | KR784633.1  | Leeds and Grenville, ON, CAN |
| <i>Asobara sp. ABX5347</i>    | JN293161.1  | Yoho NP, BC, CAN             |
| <i>Asobara sp. ACE4721.1</i>  | JN293665.1  | Glacier NP, BC, CAN          |
| <i>Asobara sp. ACE4721.2</i>  | JN292450.1  | Glacier NP, BC, CAN          |
| <i>Asobara sp. ACR5030</i>    | MF936732.1  | Gulf Islands NP, BC, CAN     |
| <i>Asobara sp. AAE0947</i>    | HQ106668.1  | Restigouche, NB, CAN         |
| <i>Asobara sp. ACF3747.1</i>  | HQ930298.1  | Bigelow, AR, USA             |
| <i>Asobara sp. ACF3747.2</i>  | KR896531.1  | Wellington County, ON, CAN   |
| <i>Asobara sp. ACF3746.01</i> | HQ929638.1  | Deadhorse Ranch SP, AZ, USA  |
| <i>Asobara sp. ACF3746.02</i> | KY843128.1  | Islamabad, Pakistan          |
| <i>Asobara sp. ACF3746.03</i> | KY845150.1  | Islamabad, Pakistan          |
| <i>Asobara sp. ACF3746.04</i> | KY838943.1  | Islamabad, Pakistan          |
| <i>Asobara sp. ACF3746.05</i> | KY830675.1  | Islamabad, Pakistan          |
| <i>Asobara sp. ACF3746.06</i> | KY843285.1  | Islamabad, Pakistan          |
| <i>Asobara sp. ACF3746.07</i> | KY832326.1  | Islamabad, Pakistan          |
| <i>Asobara sp. ACF3746.08</i> | KY842379.1  | Islamabad, Pakistan          |
| <i>Asobara sp. ACF3746.09</i> | KY830249.1  | Islamabad, Pakistan          |
| <i>Asobara sp. ACF3746.10</i> | KY840132.1  | Islamabad, Pakistan          |
| <i>Asobara sp. AsDen</i>      | MT498809.1  | Denver, CO, USA              |

**Table S2.** Species and strain names, accession numbers and collection location are given for samples used to build the phylogeny shown in Figure 1B.

| Species Name               | Strain Name      | Accession # | Collection Location    |
|----------------------------|------------------|-------------|------------------------|
| <i>Asobara sp. ABZ3773</i> | <i>ABZ3773</i>   | KR886087.1  | Elk Island NP, AB, CAN |
| <i>Asobara sp. ABX5347</i> | <i>ABX5347</i>   | JN293161.1  | Yoho NP, BC, CAN       |
| <i>Asobara triangulata</i> | <i>DSZ062</i>    | KT835413.1  | Yunnan, China          |
| <i>Asobara mesocauda</i>   | <i>DSZ061</i>    | KT835414.1  | Yunnan, China          |
| <i>Asobara rufescens</i>   | <i>TK(1)</i>     | AB920758.1  | Tokyo, Japan           |
| <i>Asobara tabida</i>      | <i>AtFr</i>      | JQ808428.1  | Sospel, France         |
| <i>Asobara citri</i>       | <i>AcIC</i>      | JQ808423.1  | Lamto, Cote d'Ivoire   |
| <i>Asobara leverii</i>     | <i>DSZ084</i>    | KT835427.1  | South Korea            |
| <i>Asobara brevicauda</i>  | <i>DSZ066</i>    | KT835453.1  | South Korea            |
| <i>Asobara persimilis</i>  | <i>AperAus</i>   | JQ808425.1  | Sydney, Australia      |
| <i>Asobara elongata</i>    | <i>DSZ048</i>    | KT835452.1  | Yunnan, China          |
| <i>Asobara japonica</i>    | <i>AjJap</i>     | JQ808424.1  | Tokyo, Japan           |
| <i>Asobara rossica</i>     | <i>A_rossica</i> | AB456708.1  | Hokkaido, Japan        |
| <i>Asobara pleuralis</i>   | <i>ApIndo</i>    | JQ808427.1  | Manado, Indonesia      |
| <i>Asobara unicolorata</i> | <i>DSZ055</i>    | KT835410.1  | Yunnan, China          |
| <i>Asobara sp. AsDen</i>   | <i>AsDen</i>     | MT498809.1  | Denver, CO, USA        |
